# Supplementary material
Source: HighWire-hosted journal article supplement (https://www.cmaj.ca/highwire/filestream/57784/field_highwire_adjunct_files/7/mat-online-appendix_8.pdf)

**Appendix 8 (as supplied by the authors): Funnel plot to assess publication bias for the outcome of low birth weight and preterm birth**

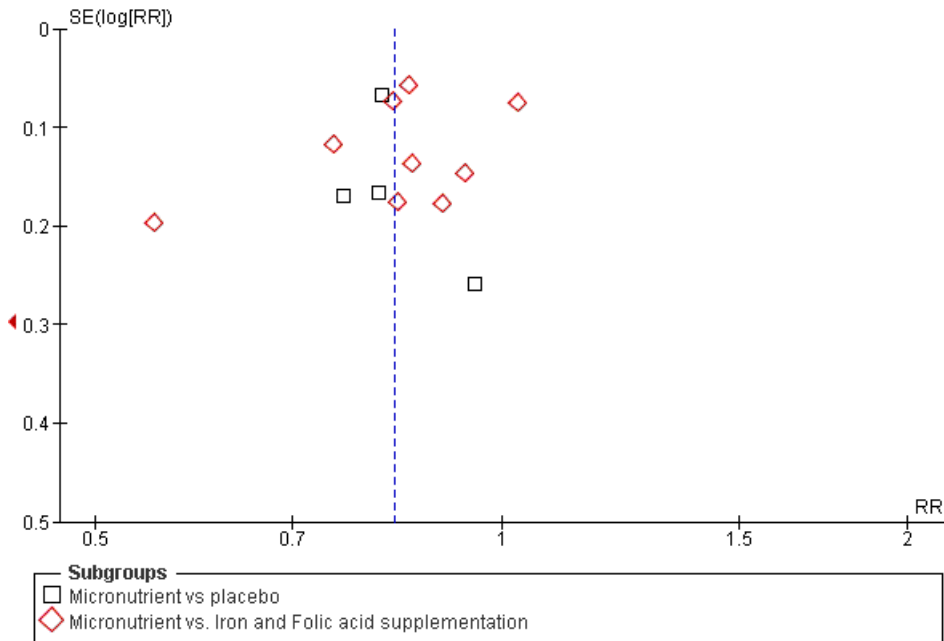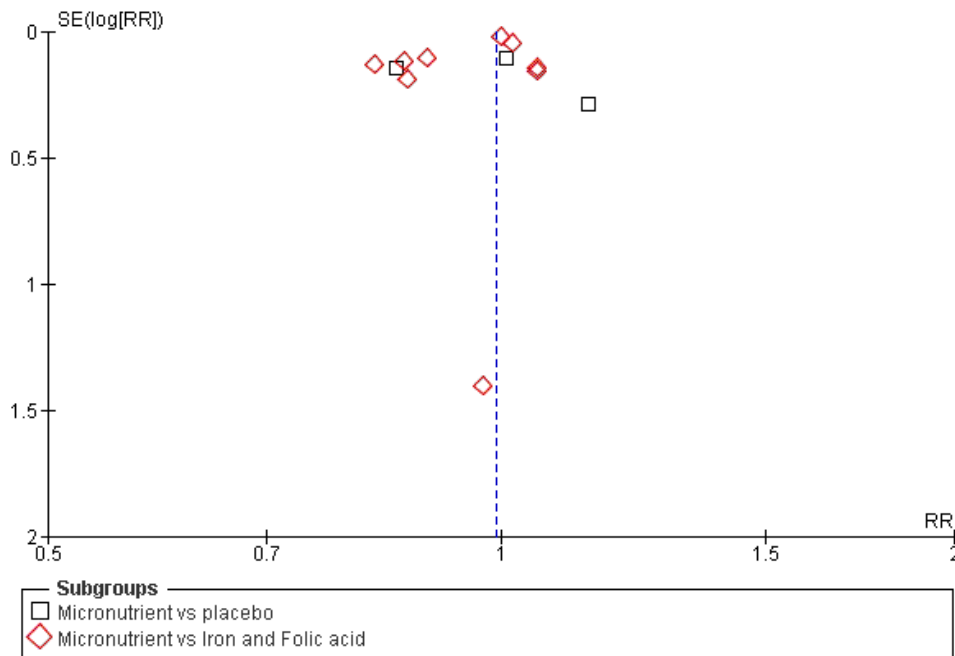

Supplement: mat-online-appendix_8.pdf [file mat-online-appendix_8.pdf]
